# Supplementary material for: Facile fabrication of robust gel poly(ionic liquid) electrolytes via base treatment at room temperature
Source: Royal Society of Chemistry journal article supplement (doi:10.1039/d1py00736j), 2021-01-01
Supplement: d1py00736j1.pdf [file d1py00736j1.pdf]

## Supporting Information

### Facile fabrication of robust gel poly(ionic liquid) electrolytes via bases treatment at room temperature

Chongrui Zhang<sup>#</sup>, Yong Zhang<sup>#</sup>, Qiang Zhao<sup>\*</sup>, Zhigang Xue<sup>\*</sup>

*Key Laboratory of Material Chemistry for Energy Conversion and Storage, Ministry of Education, Hubei Key Laboratory of Material Chemistry and Service Failure, School of Chemistry and Chemical Engineering, Huazhong University of Science and Technology, Wuhan 430074, China.*

E-mail addresses: zhaoq@hust.edu.cn (Q. Zhao); zgxue@mail.hust.edu.cn (Z. Xue).

<sup>#</sup>These authors contributed equally to this work.

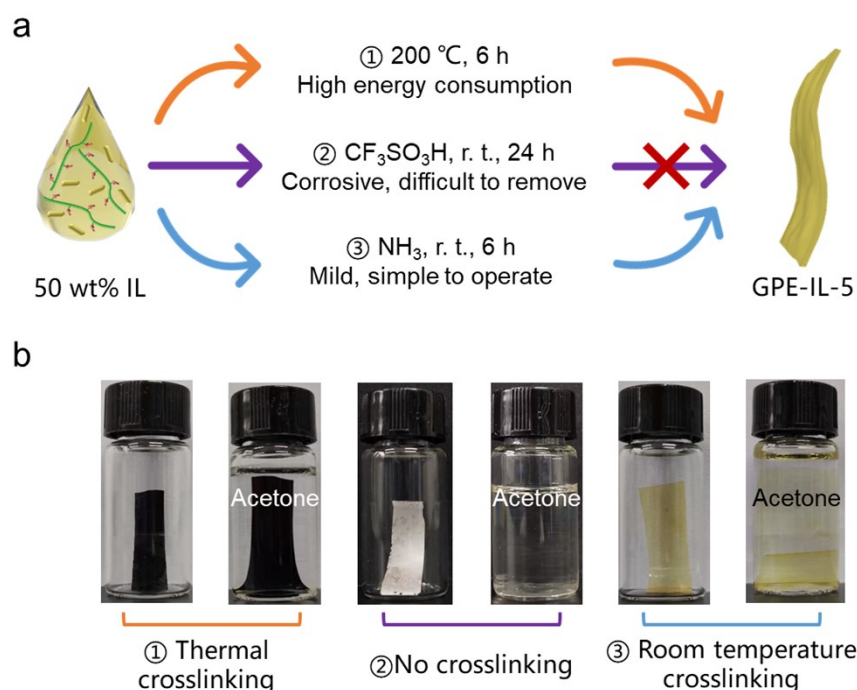

**Figure S1.** a) Schematic preparation of GPE-IL-5 via different methods including thermal annealing, CF<sub>3</sub>SO<sub>3</sub>H catalysis and ammonia annealing, respectively; b) Photographs of the membranes treated by heat, acid and ammonia, respectively before and after soaking in acetone. Please note: CF<sub>3</sub>SO<sub>3</sub>H vaporizes quickly, and dissolves the GPE-IL-5 precursor, yielding no membranes.

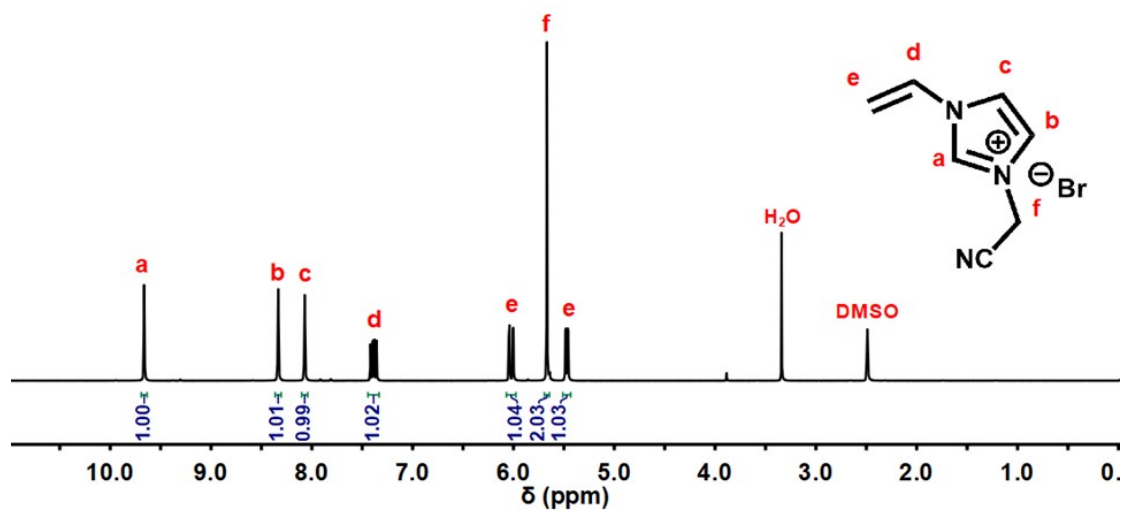

Figure S2.  $^1\text{H}$  NMR spectrum of CMVImBr monomer.

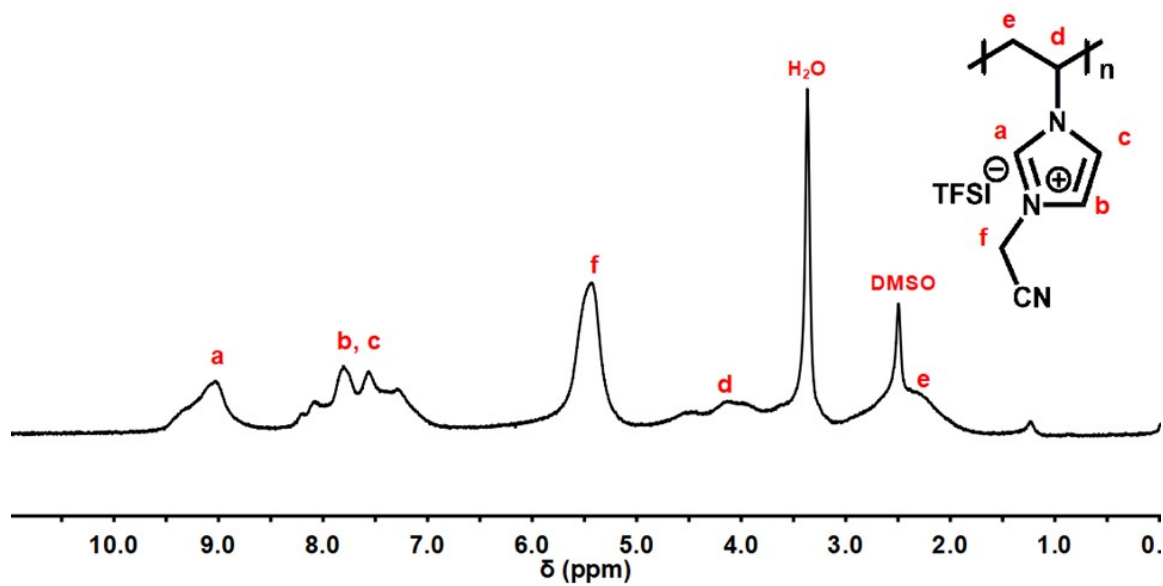

Figure S3.  $^1\text{H}$  NMR spectrum of PCMVIImTFSI.

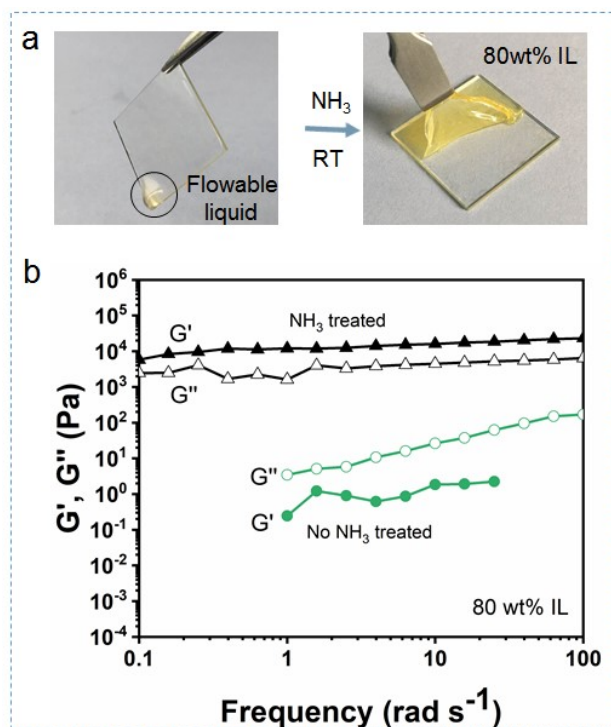

**Figure S4.** a) Photographs of GPE-IL-8 before and after  $\text{NH}_3$  vapor treatment, b) storage modulus ( $G'$ ) and loss modulus ( $G''$ ) of GPE-IL-8 before and after  $\text{NH}_3$  treatments as a function of sweeping frequency.

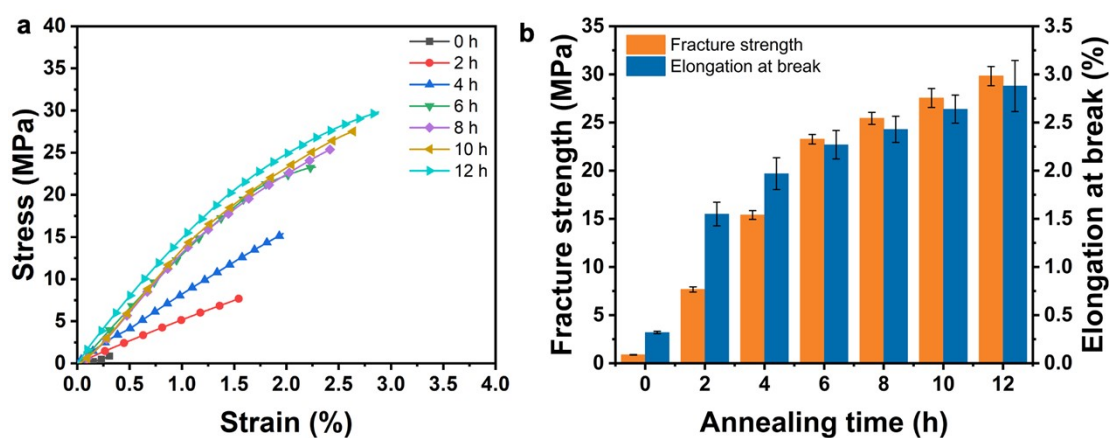

**Figure S5.** (a) Stress-strain curves of PCMVImTFSI membranes treated in  $\text{NH}_3$  vapor for varied time. (b) Effect of  $\text{NH}_3$  annealing time on fracture strength and elongation at break of PCMVImTFSI membranes.

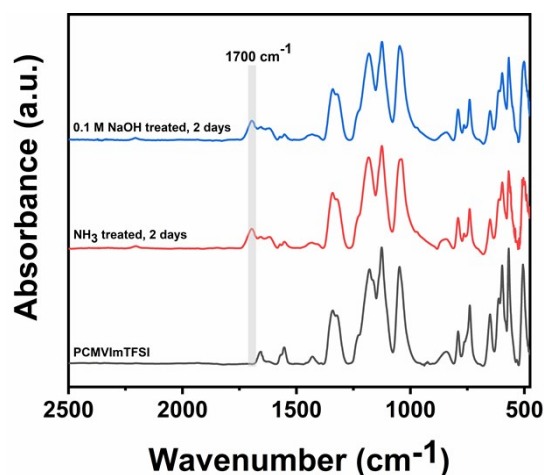

**Figure S6.** ATR-FTIR spectra of the PCMVIImTFSI membranes without any treatment (black line) and with  $\text{NH}_3$  treatment for 2 days (red line) and 0.1 M NaOH treatment for 2 days (blue line).

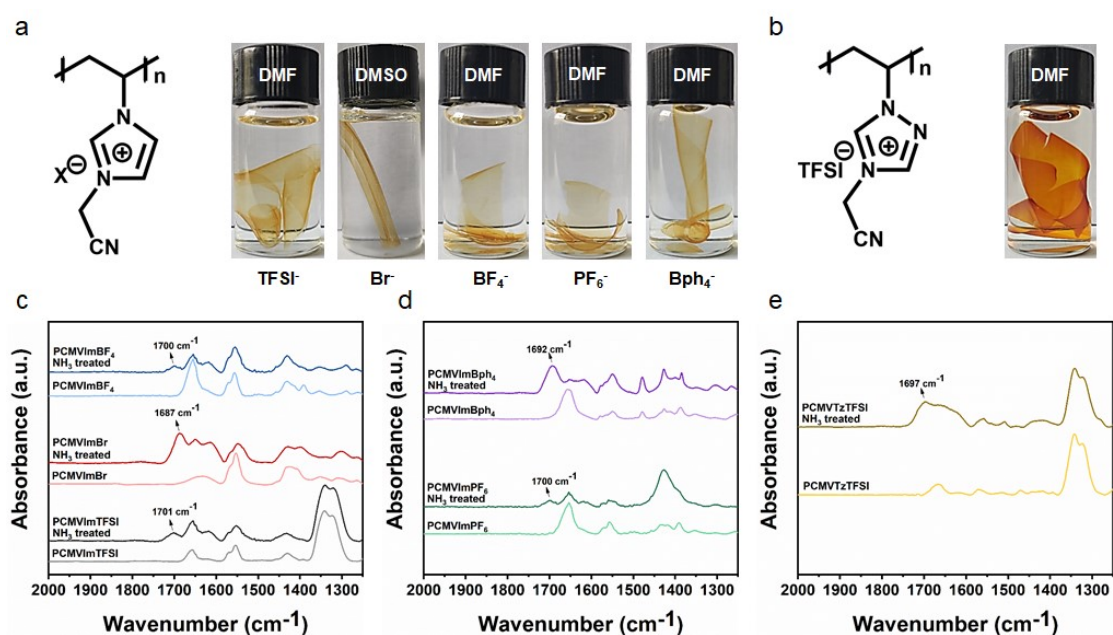

**Figure S7.** (a) Photographs of membranes made from PCMVIImX ( $X = \text{Br}^-$ , TFSI $^-$ ,  $\text{BF}_4^-$ ,  $\text{PF}_6^-$  and  $\text{Bph}_4^-$ ). (b) Photograph of poly(ionic liquid) containing triazolium cation (PCMVTzTFSI) ( $\text{NH}_3$  treated). Please note: these membranes are insoluble in DMF or DMSO. (c,d) ATR-FTIR spectra of PCMVIImX ( $X = \text{Br}^-$ , TFSI $^-$ ,  $\text{BF}_4^-$ ,  $\text{PF}_6^-$  and  $\text{Bph}_4^-$ ) before and after  $\text{NH}_3$  treatment. (e) ATR-FTIR spectra of PCMVTzTFSI (the cation is triazolium) before and after  $\text{NH}_3$  treatment.

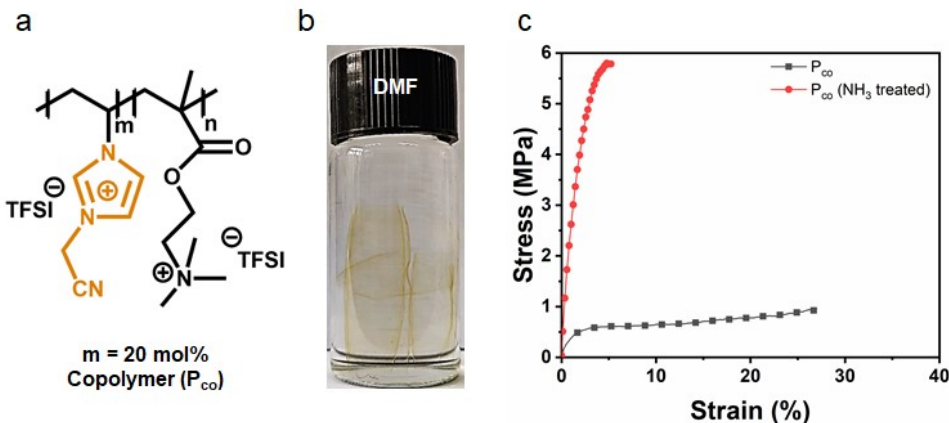

**Figure S8.** (a) Chemical structure of a copolymer (P<sub>co</sub>) containing 20 mol% nitrile monomer. (b) The photograph of P<sub>co</sub> (NH<sub>3</sub> treated) membrane immersed in DMF (note: the membrane is insoluble in DMF). (c) Stress-strain curves of P<sub>co</sub> membrane before and after NH<sub>3</sub> treatment.

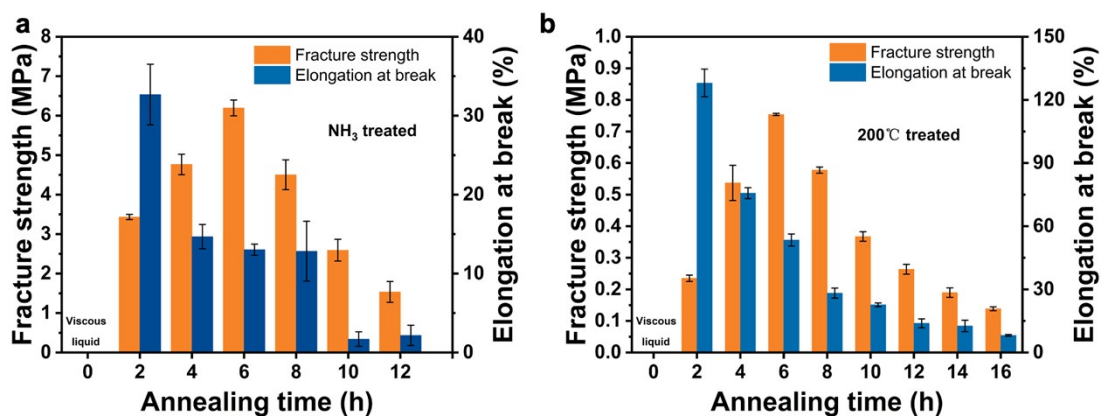

**Figure S9.** a) Effect of ammonia treatment time on fracture strength and elongation at break of GPE-IL-5; b) Effect of heat treatment time on fracture strength and elongation at break of GPE-IL-5.

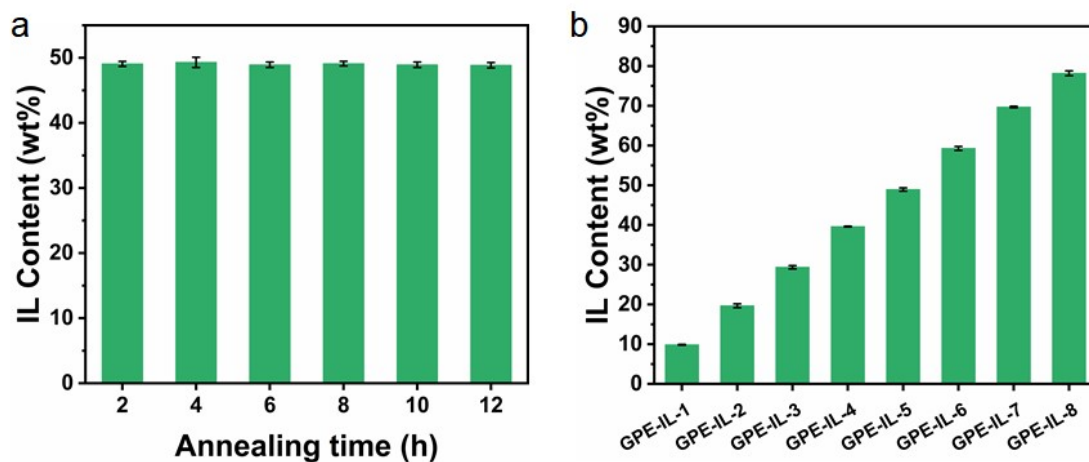

**Figure S10.** (a) Actual IL content of GPE-IL-5 with different  $\text{NH}_3$  treatment time; (b) Actual IL content of GPE membranes with different IL content (IL is extracted by ethanol, and the actual IL content is calculated by mass change).

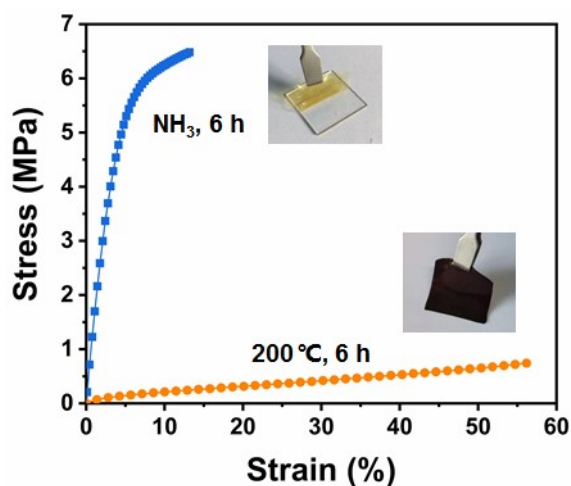

**Figure S11.** Stress-strain curves of GPE-IL-5 membrane treated with heat (200 °C) and  $\text{NH}_3$  vapor, respectively.

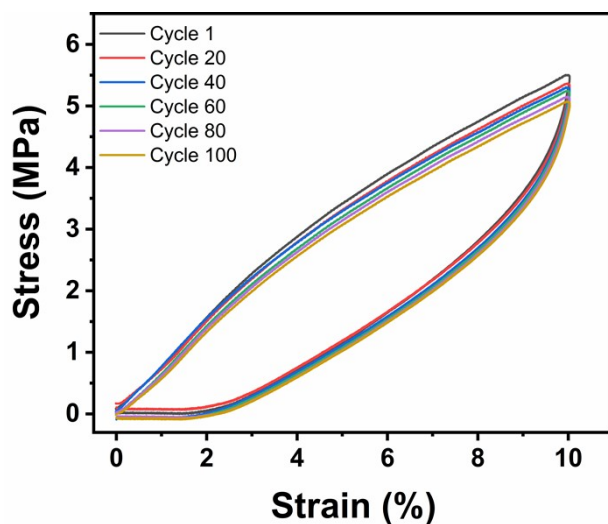

**Figure S12.** Cyclic tension of GPE-IL-5 with  $\text{NH}_3$  treatment at a strain of 10%.

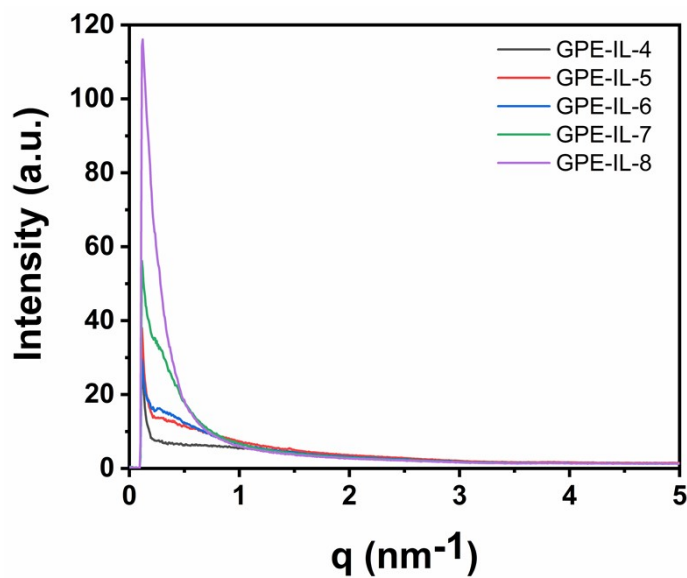

**Figure S13.** SAXS curves of GPE-IL-X ( $X = 4-8$ ) (beam size:  $0.8 \times 0.8 \text{ mm}^2$ ; pixel size:  $0.172 \times 0.172 \text{ mm}^2$ ; wavelength:  $0.134144 \text{ nm}$ ; angle of incidence:  $0.2 \text{ degree}$ ).
